# Supplementary material for: A Low Temperature Growth of Cu2O Thin Films as Hole Transporting Material for Perovskite Solar Cells
Source: MDPI journal article supplement (doi:10.3390/ma15217790), 2022-11-04
Supplement: s1 [file s1]

# Electronic Supplementary Material

## A Low Temperature Growth of Cu<sub>2</sub>O Thin Films as Hole Transporting Material for Perovskite Solar Cells

Anna L. Pellegrino <sup>1,\*</sup>, Francesca Lo Presti <sup>1</sup>, Emanuele Smecca <sup>2,\*</sup>, Salvatore Valastro <sup>2</sup>, Giuseppe Greco <sup>2</sup>, Salvatore Di Franco <sup>2</sup>, Fabrizio Roccaforte <sup>2</sup>, Alessandra Alberti <sup>2,\*</sup> and Graziella Malandrino <sup>1,\*</sup>

<sup>1</sup> Dipartimento di Scienze Chimiche, Università degli Studi di Catania, INSTM UdR Catania, Viale Andrea Doria 6, 95125 Catania, Italy

<sup>2</sup> National Research Council-Institute for Microelectronics and Microsystems (CNR-IMM), Zona Industriale Strada VIII no. 5, 95121 Catania, Italy

\* Correspondence: annalucia.pellegrino@unict.it (A.L.P.); emanuele.smecca@imm.cnr.it (E.S.); alessandra.alberti@imm.cnr.it (A.A.); gmalandrino@unict.it (G.M.)

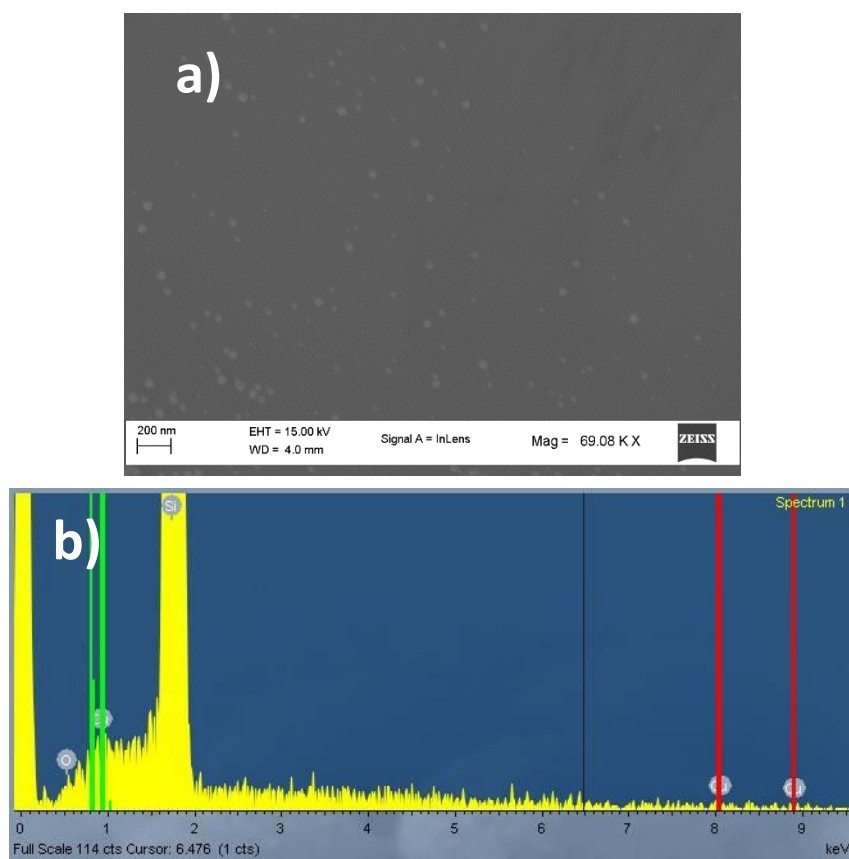

**Figure S1.** FE-SEM plan-image and EDX spectrum of the Cu<sub>2</sub>O thin film deposited on Si substrate at 200 °C.

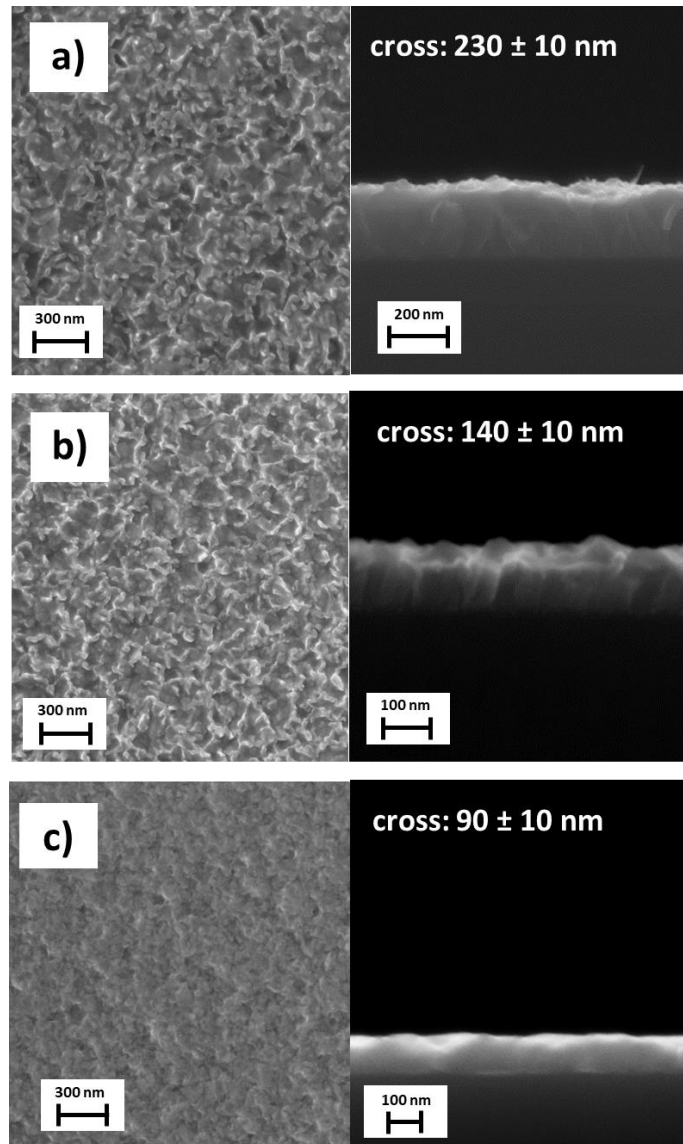

**Figure S2.** FE-SEM images in plain and cross of  $\text{Cu}_2\text{O}$  thin films deposited on Si substrate at 250 °C with different vaporization temperature and deposition time: a)  $T_{\text{vap}}$ : 140 °C, t: 30 min; b)  $T_{\text{vap}}$ : 140 °C, t: 15 min c)  $T_{\text{vap}}$ : 130 °C t: 15 min.

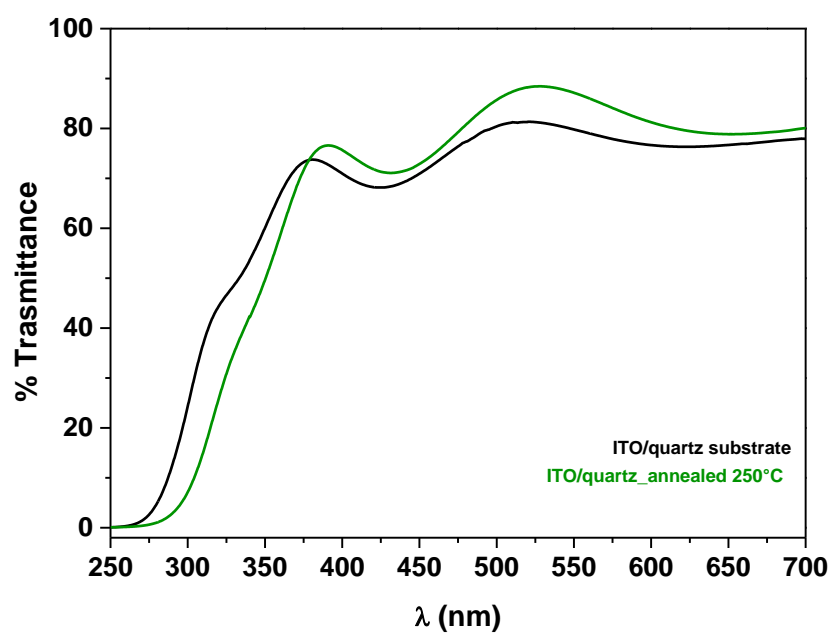

**Figure S3.** Transmittance spectra of the ITO/quartz substrate (black line); ITO/quartz substrate annealed at 250 °C.

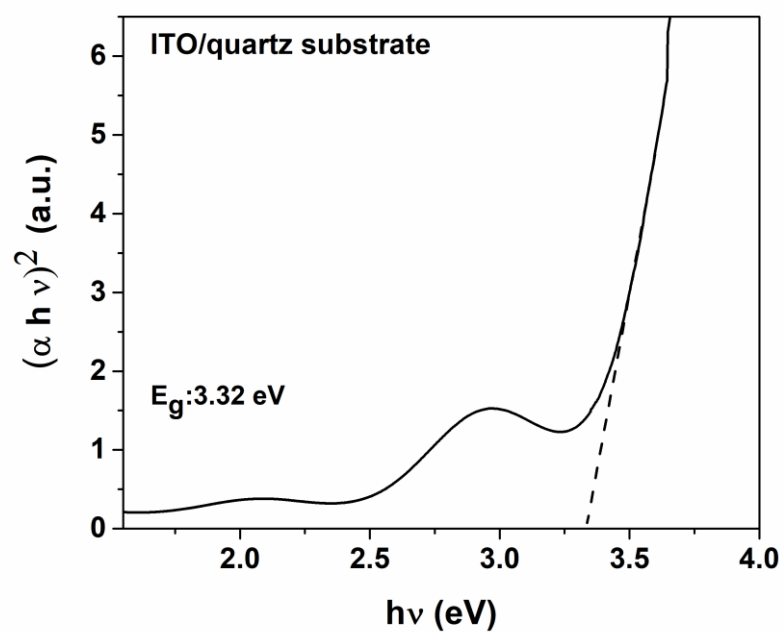

**Figure S4.** Tauc's plot [ $(\alpha h\nu)^2$  against photon energy ( $h\nu$ )] of the ITO/quartz substrate.
